# Supplementary material
Source: PubMed Central journal article supplement (PMC7723952)
Supplement: JB.00313-20-s0001.pdf [file JB.00313-20-s0001.pdf]

## Supplementary Information

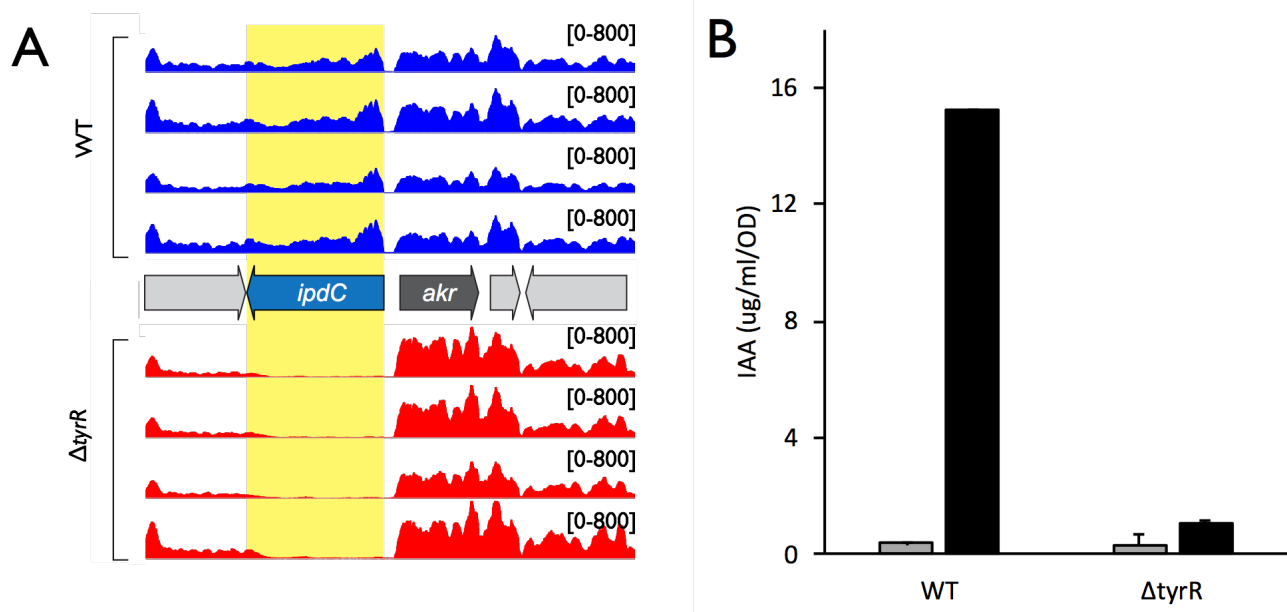

### Supplementary Figure S1. TyrR is required for expression of *ipdC* and production of IAA.

(A) Histogram of RNA-Seq read coverage per base of the *ipdC-akr* locus in the *E. ludwigii* genome. RNA-Seq reads in the wild-type strain (blue) indicate transcription beginning at 5' end of the *ipdC* gene and covering the length of the coding sequence, which is absent in the *tyrR* mutant (red). The results were similar for all biological replicates, highlighted in yellow. The maximal depth of read coverage was the same across all samples (noted in square brackets). (B) Effect of the *tyrR* deletion on IAA production in M9 minimal medium alone (grey bars) or supplemented with 1 mM L-tryptophan (black bars). Error bars indicate the standard error of the mean of three biological replicates.

```

                               kefC                               TyrR Box II
Eco_K12 TGAACCGGAAACGAAACCCTCATCCTAAT----AAAGAGTGACGTAAATCACACTTTACA
           ||||| ||| ||||| || | | |
Elu_UW5 CGAACCGGAGAGTAAACCTTCCGCGTGAAGTGG-----

                               TyrR Box I
Eco_K12 GCTAACTGTTTGT'TTTTGT'TTCATTGTAATGCGGCGAGTCCAGGGAGAGAGCGTGGACTC
                               |
Ecl_UW5 -----AGTT

                               IHF                               -35
Eco_K12 GCCAGCAGAATATAAAAATTTTCCTCAACATCATCCTCGCACCAGTCGACGACGGTTTACG
           ||||| || ||||| ||| | | | | | | | | | | | | | | | | | | | | | | | | | | | | | |
Ecl_UW5 GCCAGCAATATTA AAAAATTTCTCTATCTTTACTCAGCCGCCAGTCGACGAAAGATTAAG

                               -10      +1                               folA
Eco_K12 CTTTACGTATAGTGGCGACAATTTTTTTTATC---GGGAAATCTCAATGATCAGTCTGAT
           ||| ||||| ||||| ||||| || | || | | | | | | | | | | | | | | | | | | | | | | | | | | | | |
Ecl_UW5 CTTTCCGTATAGTGGCGCAATTTTTTTGCA-TCCGGGAAATTTTCAATGATCAGTCTGAT

```

**Supplementary Figure S2. Multiple sequence alignment of the *folA* promoter shows the absence of TyrR binding sites in *E. ludwigii*.** The locations of TyrR and IHF binding sites in *E. coli* are boxed, promoter sequences, transcription start site, *E. coli folA* start codon and *kefC* stop codon are shown in bold. *E. coli* K12 (Eco K12), *E. ludwigii* UW5 (Elu UW5).

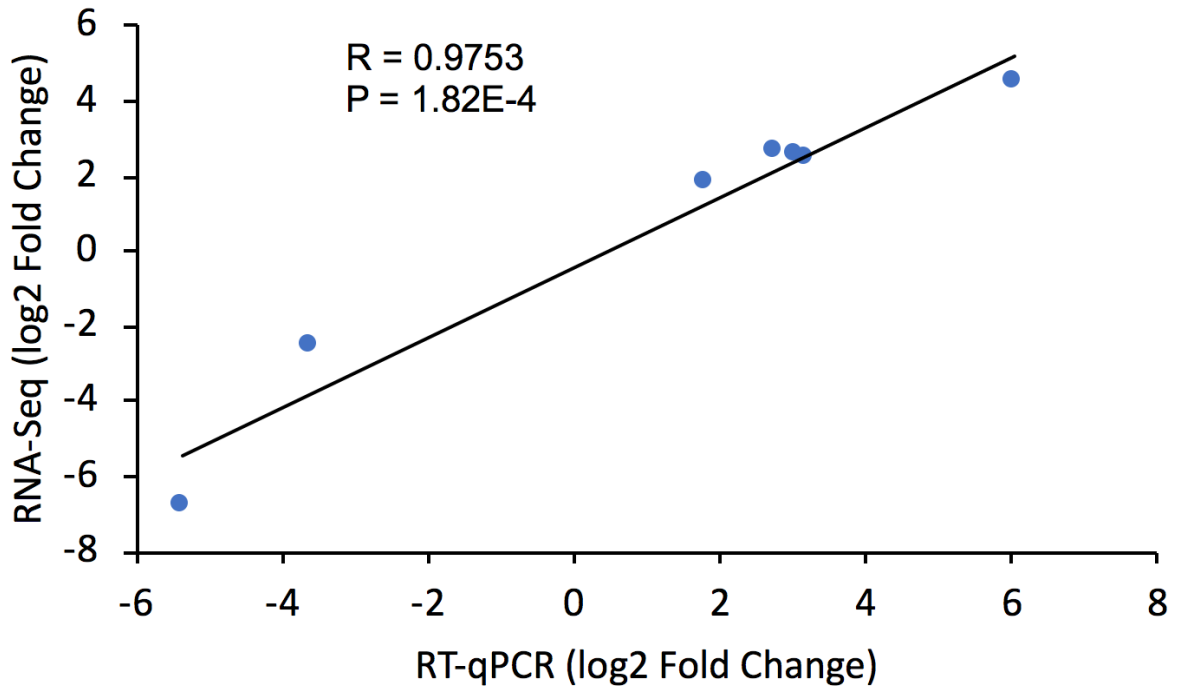

**Supplementary Figure S3. Strong correlation of gene expression levels between quantitative RT-PCR and RNA-Seq data.** Comparison of log<sub>2</sub>-fold changes for seven genes, each represented by a circle. The Pearson correlation coefficient (R), *p*-value (P), and the line of best fit from an ordinary least-squares linear regression are indicated.



TyrR

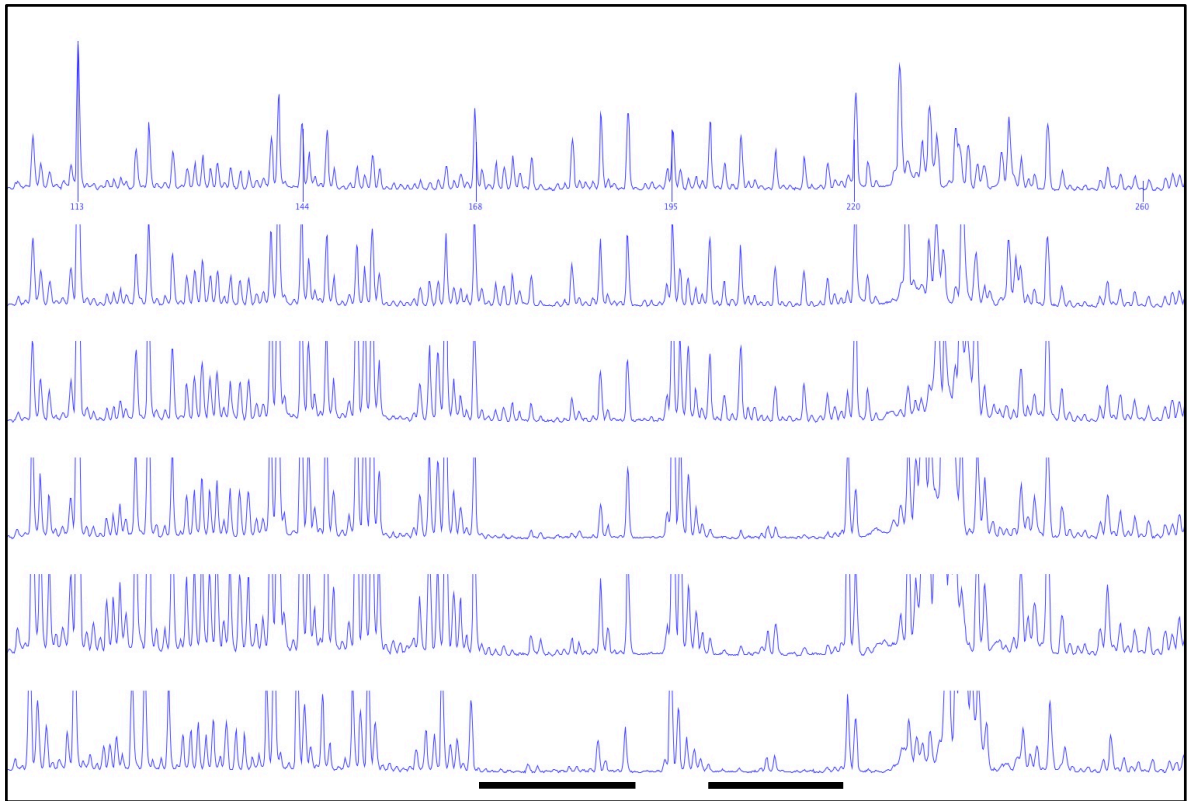

TyrR

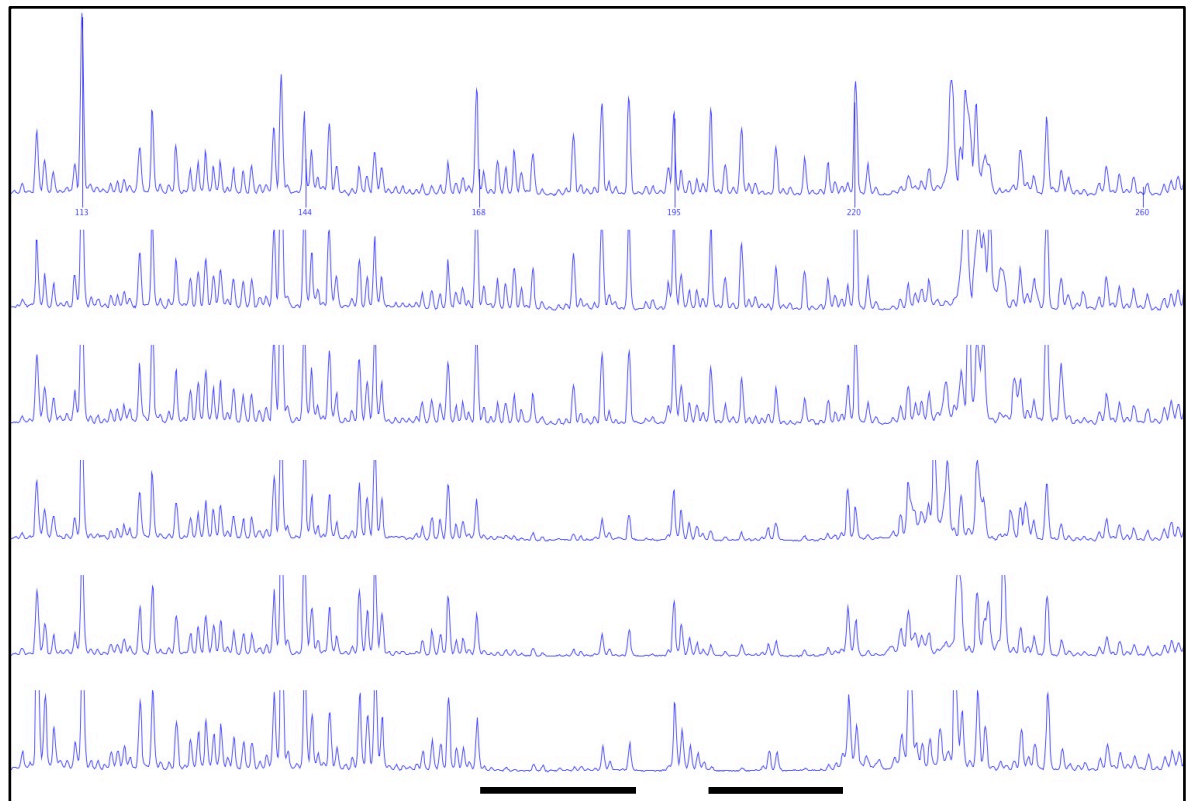

Supplementary Figure S5. DNase I footprinting assays indicate two TyrR binding sites in the *dmpM* promoter region. A 302 bp FAM-labeled PCR fragment containing the *dmpM* promoter region was incubated with increasing amounts (0, 0.18, 0.37, 0.75, 1.5, and 3.0  $\mu\text{g}$ ) of TyrR in the absence (top panel) and presence (bottom panel) of 1 mM tyrosine prior to digestion with DNase I. Larger regions of the same traces in Figure 5 are shown. Numbers on the upper trace correspond to the nucleotide position in the PCR fragment. Solid black bars highlight regions between nucleotides 169-188 and 199-218 that are protected from DNase I digestion as determined by capillary electrophoresis.

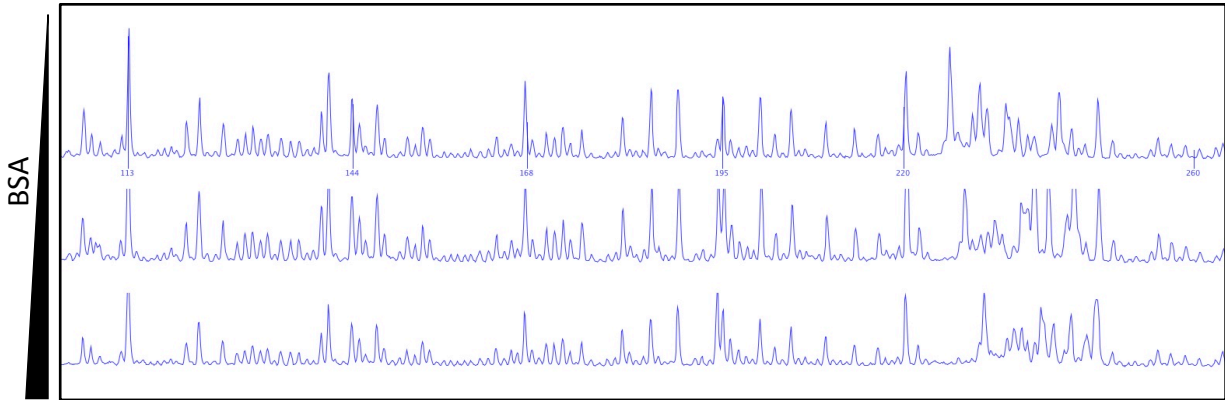

Supplementary Figure S6. Control DNase I footprinting assays show that bovine serum albumin (BSA) did not protect the *dmpM* promoter region from DNase I digestion. A FAM-labeled PCR fragment containing the *dmpM* promoter region was incubated with increasing amounts (0, 15, and 30  $\mu\text{g}$ ) of BSA prior to digestion with DNase I. Numbers shown on the upper trace correspond to the nucleotide position in the PCR fragment.

```

TTGTTTAAATACCTCCGAGGCAGAAATTACGTCATCA-GACGTCGCTAATCCATGACTTT
|||||
TTGTTTAAATACCTCCGAGGCAGAAATTACGACATCAAGGC-TATCTAATCCATGACTTT

      Cpx box 1          Cpx box 2          Cpx box 3
ACGTTGTTTTACACCCCCTGACGCATGTTTGCAGCCTGAATCGTAAACTCTCTATCGTTG
|||||
ACGTTGTTTTACACCCCTGACGCATGTTTGCAGCCTGAATCGTAGACTGTCTCTCGTTG

                                cpxP
AATCGCGACA-GAAAGATTTTGGGAGCAAATGATG
|||||
AATCGCGACACGAAAGATTTTGGGAGCAAGTGATG

```

Supplementary Figure S7. Alignment of *cpxR-cpxP* intergenic regions of *E. coli* (top sequence) and *E. ludwigii* (bottom sequence) indicate that CpxR binding sites (boxed) determined for *E. coli* (2, 3) are conserved in *E. ludwigii*. Promoter sequences, transcription start site, and start codon for *E. coli cpxP* are shown in bold.



TyrR

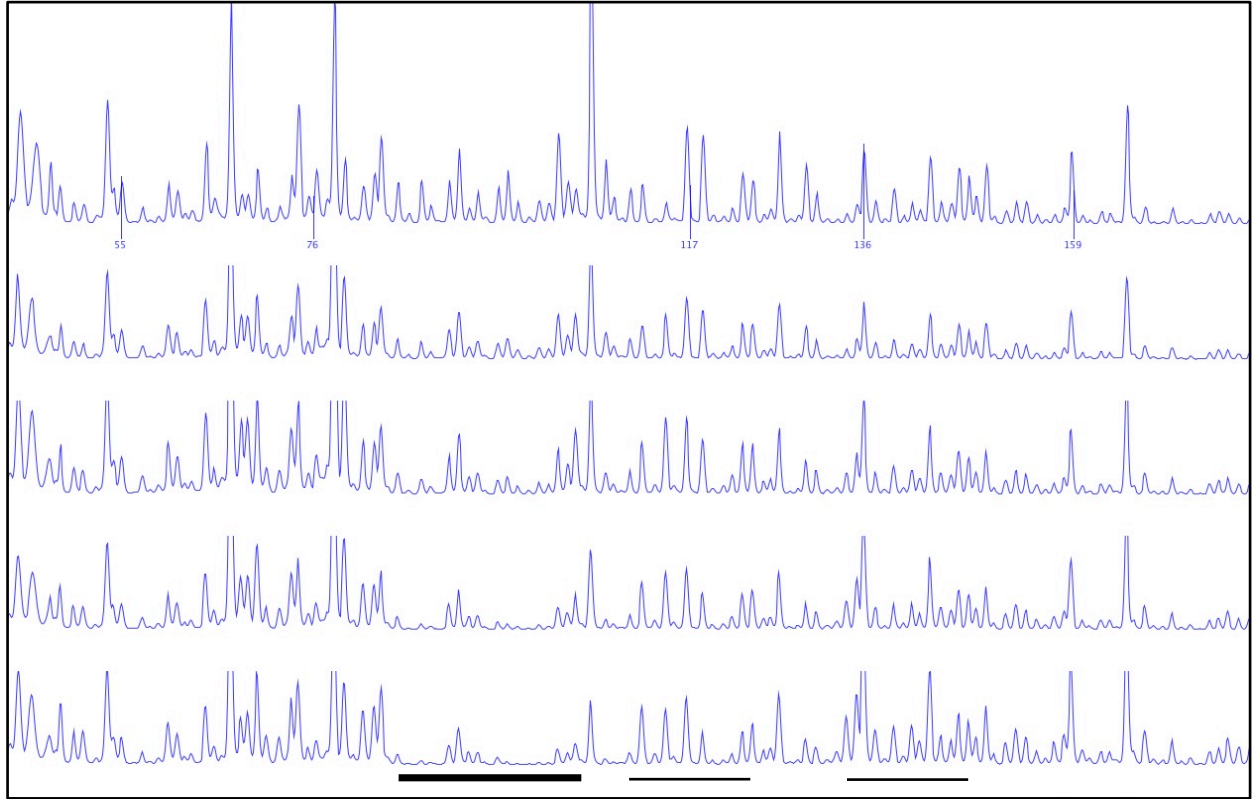

TyrR

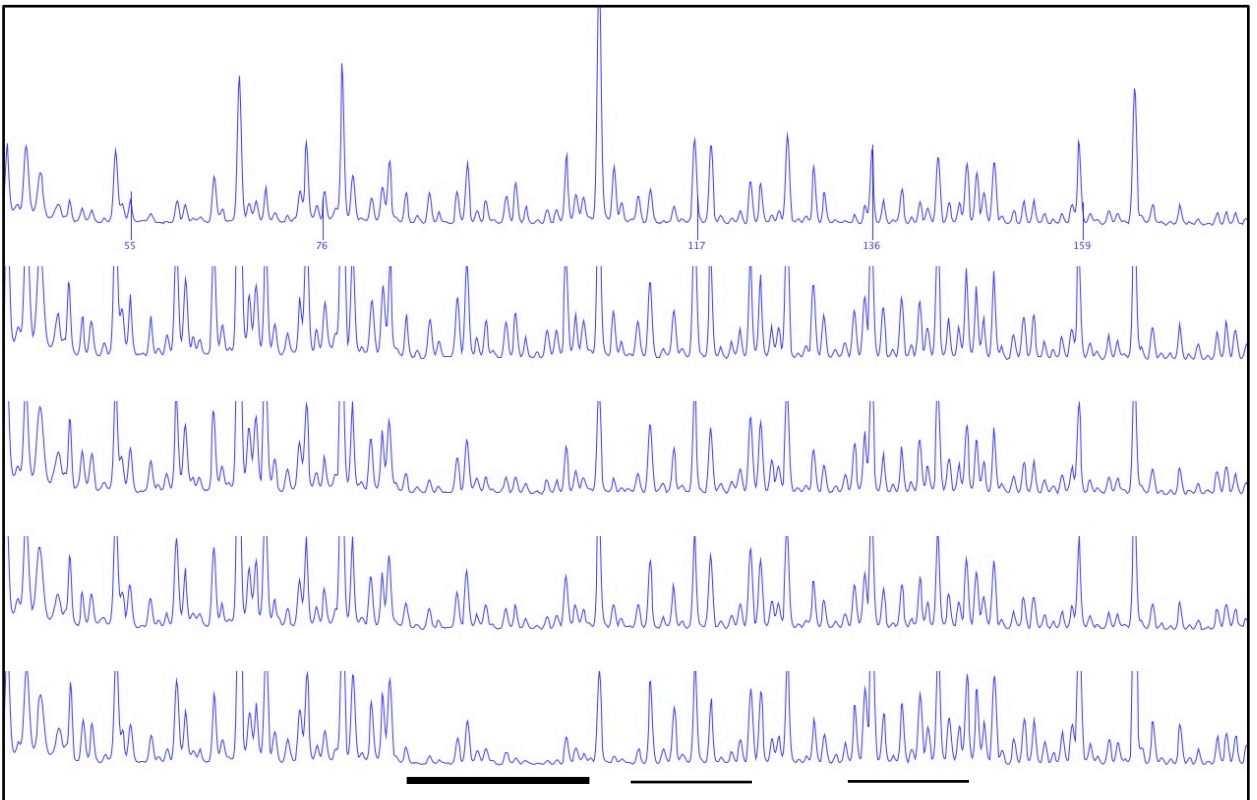

Supplementary Figure S8. DNase I footprinting assays indicate a single TyrR binding site in the *cpxR-cpxP* intergenic region. A 238 bp FAM-labeled PCR fragment containing the *cpxR-cpxP* intergenic region was incubated with increasing amounts (0, 0.75, 1.5, 3.0, and 6.0  $\mu\text{g}$ ) of TyrR in the absence (top panel) and presence (bottom panel) of 1 mM tyrosine prior to digestion with DNase I. Larger regions of the same traces in Figure 9 are shown. Numbers shown on the upper trace correspond to the nucleotide position in the PCR fragment. The thick black bars highlight regions between nucleotides 85-105, which encompass box 1, that are protected from DNase I digestion as determined by capillary electrophoresis. The thin black bars indicate the regions containing boxes 2 and 3 (see Figure 7), which are not protected.

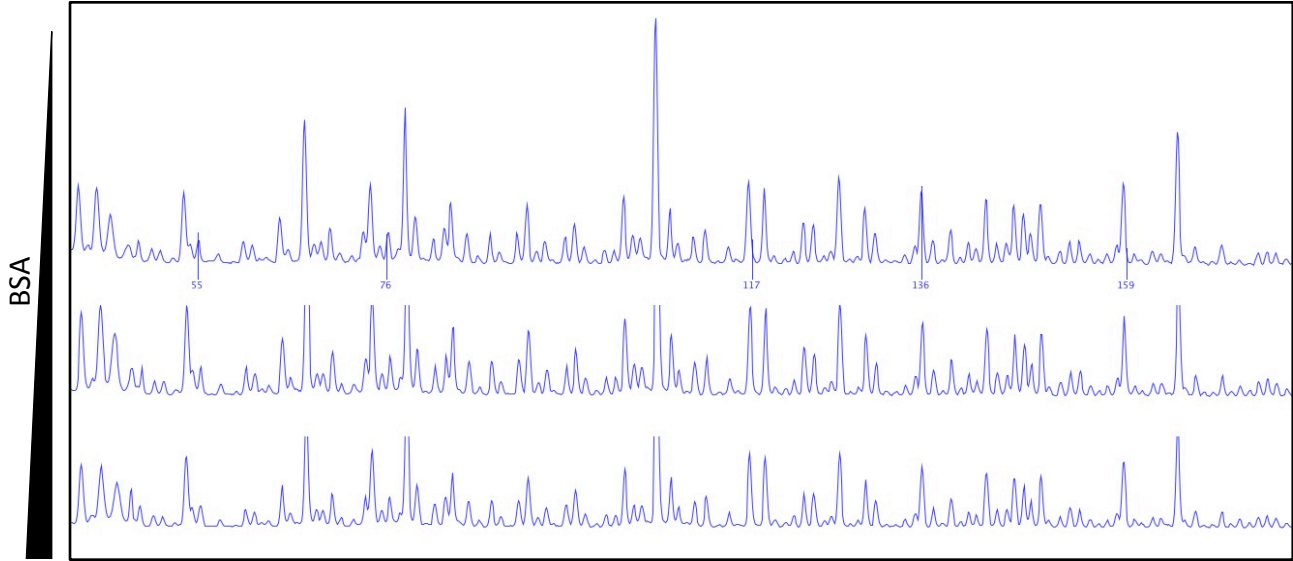

Supplementary Figure S9. Control DNase I footprinting assays show that bovine serum albumin (BSA) did not protect the *cpxR-cpxP* intergenic region from DNase I digestion. A FAM-labeled PCR fragment containing the *cpxR-cpxP* intergenic region was incubated with increasing amounts (0, 15, and 30  $\mu$ g) of BSA prior to digestion with DNase I. Numbers shown on the upper trace correspond to the nucleotide position in the PCR fragment.

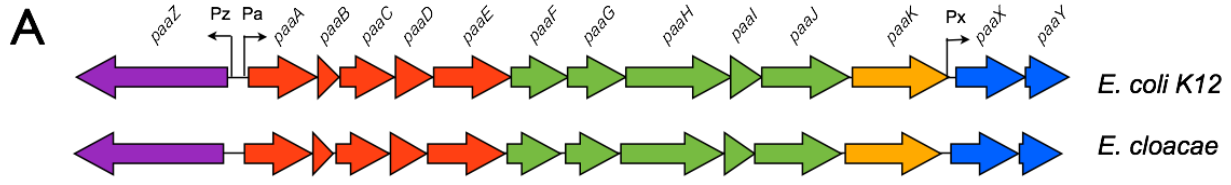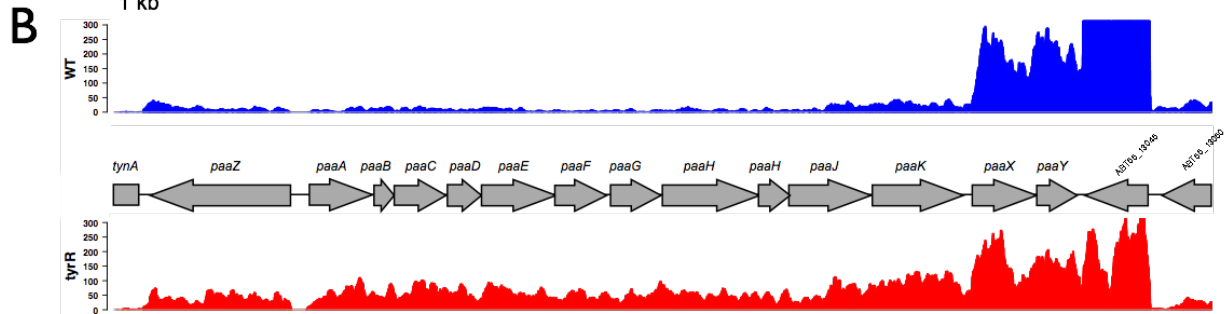

**C**

|          |                                                                                |     |
|----------|--------------------------------------------------------------------------------|-----|
|          | MET                                                                            |     |
| Eco_K12  | CCAGGTACCGGATAAGAAAC <b>TGGCTAACTGCTGCATCGCTACTCTCCAGATGTTTCACAT</b>           | 60  |
| Ec1_WSU1 | CCAGGCACCGGACAAGAAGCTGGCTAACTGCTGCATCGCTTATCTCCAAGTGTACGTAA                    | 60  |
| Ec1_UW5  | CCAGGTGCCGGACAAGAAGCTGGCTAACTGCTGCATCGCTTATCTCCAAGTGTACGTAA                    | 60  |
|          | *****                                                                          |     |
|          | +1 Pz PaaX box                                                                 |     |
| Eco_K12  | <b>TTCTGTTGCTAATAGTTAAATCGCGAATCA</b> TAAAAAGCAAAGGATCTTTTAACGAAATGT           | 120 |
| Ec1_WSU1 | TTTCACTATCAATAGTTTAAATCATGAATCATAAAAAAGCAAGCTGAGTTTTAATGAATTGT                 | 120 |
| Ec1_UW5  | TTTCACTATCAATAGTTTAAATCATGAATCATAAAAAAGCAAGCTGAGTTTTAATGAATTGT                 | 120 |
|          | ** * *****                                                                     |     |
|          | IHF                                                                            |     |
| Eco_K12  | TAACTATGCGATCTGTA <b>TAGCAACTGCCGA</b> AAAAATTAATGCACTGATAAATAATGATTT          | 180 |
| Ec1_WSU1 | TAACTATGCGATCTGTAATGAAGTGGAAAGGCCGGAAGC-CCC GTTATGCAGGCC TTG                   | 179 |
| Ec1_UW5  | TAACTATGCGATCTGTAATGAAGTGGAAAGGCCGGAAGC-CCC GTTATGCAGGCC TTG                   | 179 |
|          | **** * * * * *                                                                 |     |
|          | CRP -35                                                                        |     |
| Eco_K12  | ATAAAAAATAGGGTGC <b>GAAATCCGTCACAGT</b> CAAAACATACAAAATTTGTGATTTTACTTA         | 240 |
| Ec1_WSU1 | TGCAAAAAGCCTTGGCAGCACCATCACAAAATAGGGAAACATTTCTTGGGGTTGATTTTA                   | 239 |
| Ec1_UW5  | TGCAAAAAGCCTTGGCAGCACCATCACAAAATAGGGAAACATTTCTTGGGGTTATATTTA                   | 239 |
|          | **** ***** * * * * *                                                           |     |
|          | -10 +1 Pa PaaX box                                                             |     |
| Eco_K12  | ACT <b>ATTG</b> TGTAAC <b>TTTCATAAAACAATG</b> TGATTCGTGT-TTTTAATTAATTCACGAAAAC | 299 |
| Ec1_WSU1 | ACCTTTGTGTAACTTTTAAGAAACGAAGTGATTCAGTATTTCACTTTAGGTGGTAAATAA                   | 299 |
| Ec1_UW5  | ACCTTTGTGTAACTTTTAAGAAATGAAGTGATTCAGTATTTCACTTTAAGTGGTAAATAA                   | 299 |
|          | ** ***** * * * * *                                                             |     |
|          | MET                                                                            |     |
| Eco_K12  | <b>TGGAATCG</b> TAAAGGTGATGAC <b>GTG</b> ACCCAAGAAGAACGCTTTGAGCAACGGATAGCCC    | 357 |
| Ec1_WSU1 | TGAATCATAAAGGTGATGAC <b>GTG</b> ACGCAAGAACAACGCTTTGAGCAGCGCATAGCGC             | 357 |
| Ec1_UW5  | TGAATCATAAAGGTGATGAC <b>GTG</b> ACGCAAGAACAACGCTTTGAGCAGCGCATAGCGC             | 357 |
|          | * *****                                                                        |     |

**Supplementary Figure S10. The *paa* catabolic operon for phenylacetate degradation in *E. ludwigii*.** (A) Genome synteny of the *paa* genes of *E. ludwigii* and *E. coli* K12. Genes encoding the ring-hydroxylating complex are in red (*paaABCDE*), the beta-oxidation enzymes in green (*paaFGHIJ*), the phenylacetate-CoA ligase in orange (*paaK*), the transcriptional repressor and thioesterase in blue (*paaX*), and a ring opening enzyme in purple (*paaZ*). (B) RNA-Seq reads mapped to the *paa* operon in the wild-type (blue) and *tyrR* mutant (red) *E. ludwigii*. Read coverage is consistent across the length of the operon. (C) Multiple sequence alignment of the intergenic region of divergently transcribed *paaZ* and *paaA* genes of *E. coli* K12, *E. ludwigii* UW5, and *E. ludwigii* EcWSU1. The locations of *E. coli* PaaX, IHF, and CRP binding sites are boxed and the promoter elements are in bold. Start codons for *paaZ* and *paaA* are in bold. Conserved nucleotides are indicated with asterisks.

**Supplementary Table S1.** Bacterial strains and plasmids used in this study

| Strain or Plasmid   | Relevant characteristics                                                                                                                                            | Reference  |
|---------------------|---------------------------------------------------------------------------------------------------------------------------------------------------------------------|------------|
| <i>E. coli</i>      |                                                                                                                                                                     |            |
| JM109               | Cloning host                                                                                                                                                        | Promega    |
| S17-1 $\lambda$ pir | Cloning host; Tp <sup>r</sup> Sm <sup>r</sup> <i>recA thi pro hsdR</i> -M+ RP4-2-Tc::Mu-Km::Tn7 $\lambda$ pir                                                       | (4)        |
| A118                | His <sub>6</sub> -TyrR expression host; M15 strain (pREP4, pQEtyrR)                                                                                                 | (5)        |
| <i>E. ludwigii</i>  |                                                                                                                                                                     |            |
| UW5                 | Wild type strain; Amp <sup>r</sup>                                                                                                                                  | (5)        |
| J224                | UW5 $\Delta$ <i>tyrR</i>                                                                                                                                            | This study |
| Plasmids            |                                                                                                                                                                     |            |
| pKD4                | Source of FRT-flanked Km <sup>r</sup> gene; rep R6K Amp <sup>r</sup> FRT-Km <sup>r</sup> -FRT                                                                       | (6)        |
| pJQ200SK            | Low copy number suicide vector; Gm <sup>r</sup> <i>sacB</i>                                                                                                         | (7)        |
| pCP20               | Temperature-sensitive replication and induction of FLP-recombinase; rep pSC101 <sup>ts</sup> Amp <sup>r</sup> Cm <sup>r</sup> <i>cI857</i> $\lambda$ P <sub>R</sub> | (6)        |
| pGEM-T Easy         | Cloning vector; Amp <sup>r</sup>                                                                                                                                    | Promega    |
| pUCdmpM             | pUCIDT-AMP cloning vector; Amp <sup>r</sup> ; 276 bp <i>dmpM</i> promoter                                                                                           | IDT        |
| pUCdmpM-mut1        | pUCdmpM with TyrR box 1 mutation                                                                                                                                    | This study |
| pUCdmpM-mut2        | pUCdmpM with TyrR box 2 mutation                                                                                                                                    | This study |
| pUCdmpM-mut3        | pUCdmpM with TyrR box 1 and 2 mutations                                                                                                                             | This study |
| pIDTcpx             | pIDTSMART-AMP cloning vector; Amp <sup>r</sup> ; 151 bp <i>cpxR-cpxP</i> intergenic region                                                                          | IDT        |
| pIDTcpx-mut1        | pIDTcpx with CpxR box 1 mutation                                                                                                                                    | This study |
| pIDTcpx-mut2        | pIDTcpx with CpxR box 2 mutation                                                                                                                                    | This study |
| pIDTcpx-mut3        | pIDTcpx with CpxR box 3 mutation                                                                                                                                    | This study |
| pTUD                | pGEM-T Easy; 1.5 kb insert of <i>tyrR</i> upstream and downstream flanking regions (TUD)                                                                            | This study |
| pTUD-Km             | pTUD::FRT-Km <sup>r</sup> -FRT                                                                                                                                      | This study |
| pJQTUD-Km           | pJQ200SK; TUD::FRT-Km <sup>r</sup> -FRT                                                                                                                             | This study |

Supplementary Table S2. Oligonucleotides used in this study. Fluorescent modifications are in square brackets.

| Primer   | Sequence 5'-3'                         | Reference  |
|----------|----------------------------------------|------------|
| TUF-PstI | AAAAAACTGCAGGGGATCTGCTCCACAGTCAC       | This study |
| TUR-XbaI | CGAAAAATGGCTCTAGAGGGAAATTCACCGTTTAAAG  | This study |
| TDF-XbaI | GTGAATTTCCCTCTAGACGGTAAAAAGCCTCTGTAAAC | This study |
| TDR-SacI | AAAAAAGAGCTCTGTATCGCAGGTTGAAGTGG       | This study |
| PKDP1    | GTGTAGGCTGGAGCTGCTTC                   | (6)        |
| PKDP2    | CATATGAATATCCTCCTTAG                   | (6)        |
| TUF      | GATCTGTTGCGACCGAGTG                    | This study |
| TUR      | TTTCTACGTGTTCCGCTTCC                   | This study |
| TDF      | CAAAGCGCTCTGAAGTTCC                    | This study |
| TDR      | CCAAATCTACACGCTTCACG                   | This study |
| ICRTIF   | TCGAACTCAGCAAACAGCAC                   | (5)        |
| ICRTIR   | AGGTTTGCAACGTTCTCCAG                   | (5)        |
| recAF2   | GCTGGACCCTGTTTATGCTC                   | This study |
| recAR1   | GCCTTCGATTTTCAGCTTTTG                  | This study |
| proP35   | ACTATAAAACCCTCACGCTCG                  | This study |
| proP160  | GCAACCACTCCGGGATATC                    | This study |
| eco145   | GTCATTCAGTTACCCGCTCAG                  | This study |
| eco269   | TCCAGGGTTTTGCTTTCCAG                   | This study |
| aroG576  | CATTAAGGTGGCAATTGACGC                  | This study |
| aroG670  | TGGTATTCACAATGGCGGAG                   | This study |
| yagU384  | ACTCTGGCAAGGTTTACTGG                   | This study |
| yagU518  | AAATGCCCCACGATCTCTG                    | This study |

| Primer     | Sequence 5'-3'                              | Reference  |
|------------|---------------------------------------------|------------|
| cpxP356    | AGATGTTCCACCTGCTAACG                        | This study |
| cpxP494    | CGGGTACTGCTATTGCTACTG                       | This study |
| cpxR209    | ACCAGACGCCCGTAATTATG                        | This study |
| cpxR302    | GGCTTTGGTAAATAGTCATCCG                      | This study |
| dmpM161    | CCGATATGCTGAAACTTGACG                       | This study |
| dmpM294    | GTGGTCCTTACAGAGAAAGTGG                      | This study |
| dmpM-F-FAM | [6FAM]GGTGATCAGCCTGTGCTCTA                  | This study |
| dmpM-R     | TGTGAATTTCTTATTTACAGCTACCG                  | This study |
| cpx-F-FAM  | [6FAM]CTGAGGCTCGTCCTGAATG                   | This study |
| cpx-R      | TGATCGTGGACCGATCATAAC                       | This study |
| dmpM-F1    | CAACCGTTAATTTTCGCATTC                       | This study |
| dmpM-R-FAM | [6FAM]GCTACCGGGTACAGTTAAACC                 | This study |
| cpx-F1     | CCTCCGAGGCAGAAATTACG                        | This study |
| cpx-R-FAM  | [6FAM]AAATCTTTCGTGTCGCGATT                  | This study |
| SDM1-F     | TATAACTTAAATGTTATTCCTGTTTTCTGGGAGGGG        | This study |
| SDM1-R     | AATAACATTTAAGTTATATAAGACAGACTCCTGTAAATAAAAC | This study |
| SDM2-F     | TATCCGGTTTTATTTATAGGAGTCTGTCTTATGTAAC       | This study |
| SDM2-R     | TATAAATAAAACCGGATATTAAGTCACCGTTTTTTAATG     | This study |
| SDM2-F2    | TATCCGGTTTTATTTATAGGAGTCTGTCTTATATAAC       | This study |



**Supplementary Table S3.** Sequences of the wild-type and mutant *dmpM* and *cpx* promoters inserted in pUCIDT-AMP and pIDTSMART-AMP, respectively, used as templates to generate probes for EMSAs. Primer binding sites are indicated in italics. The *dmpM* fragment is flanked outside EcoRI sites by GC adapters (lower case), which were necessary to improve the synthesis reaction due to low GC content of the target sequence. Predicted TyrR binding sites in the *dmpM* and *cpx* promoters are underlined, and substituted nucleotides in mutant promoters are in bold lowercase.

| Insert    | Characteristics                 | Sequence 5'-3'                                                                                                                                                                                                                                                                                                                                                                                                                                                                                   |
|-----------|---------------------------------|--------------------------------------------------------------------------------------------------------------------------------------------------------------------------------------------------------------------------------------------------------------------------------------------------------------------------------------------------------------------------------------------------------------------------------------------------------------------------------------------------|
| dmpM-wt   | Wild type promoter              | <p>ctcacttgtagaacggtgatcagcctgtgctctagagcctgatagttgagcgatacac<br/> acGAATTC<i>CAACCGTTAATTTTCGCATTC</i>CAGATATATATAACAATATTTACAGGCCACA<br/> CCCGAAATGAATTGAAAAACGCATGATCTTTAACGGTATTAGTTACCAGCATTA<br/> AACGGTGACTTAAT<u>GTCCGGTTTTATTTACAGGAGTCTGTCTTATGTA</u>ACTTAAATGT<br/> <u>TACTCCTGTTTTCTGGGAGGGGGCGTT</u>ACATATGAAGTAATAAAGGTTAACTGTACC<br/> CGGTAGCTGTAAATAAGAAATTCACATTTTTTAATCCTTCAGGAGCTAATGAATTCtg<br/> atcgttgaagtcgacctacatcgagtgcgactatcaagagtgttccagtcacgcgat</p>               |
| dmpM-mut1 | Predicted TyrR box 1<br>mutated | <p>ctcacttgtagaacggtgatcagcctgtgctctagagcctgatagttgagcgatacac<br/> acGAATTC<i>CAACCGTTAATTTTCGCATTC</i>CAGATATATATAACAATATTTACAGGCCACA<br/> CCCGAAATGAATTGAAAAACGCATGATCTTTAACGGTATTAGTTACCAGCATTA<br/> AACGGTGACTTAAT<u>GTCCGGTTTTATTTACAGGAGTCTGTCTTATa</u>TAACTTAAATGT<br/> <u>TAt</u>TCTGTTTTCTGGGAGGGGGCGTTACATATGAAGTAATAAAGGTTAACTGTACC<br/> CGGTAGCTGTAAATAAGAAATTCACATTTTTTAATCCTTCAGGAGCTAATGAATTCtg<br/> atcgttgaagtcgacctacatcgagtgcgactatcaagagtgttccagtcacgcgat</p>                |
| dmpM-mut2 | Predicted TyrR box 2<br>mutated | <p>ctcacttgtagaacggtgatcagcctgtgctctagagcctgatagttgagcgatacac<br/> acGAATTC<i>CAACCGTTAATTTTCGCATTC</i>CAGATATATATAACAATATTTACAGGCCACA<br/> CCCGAAATGAATTGAAAAACGCATGATCTTTAACGGTATTAGTTACCAGCATTA<br/> AACGGTGACTTAAT<u>a</u>TCCGGTTTTATTTA<u>t</u>AGGAGTCTGTCTTATGTA<u>ACTTAAATGT</u><br/> <u>TACTCCTGTTTTCTGGGAGGGGGCGTT</u>ACATATGAAGTAATAAAGGTTAACTGTACC<br/> CGGTAGCTGTAAATAAGAAATTCACATTTTTTAATCCTTCAGGAGCTAATGAATTCtg<br/> atcgttgaagtcgacctacatcgagtgcgactatcaagagtgttccagtcacgcgat</p> |

| Insert    | Characteristics                         | Sequence 5'-3'                                                                                                                                                                                                                                                                                                                                                                                                                                                                                 |
|-----------|-----------------------------------------|------------------------------------------------------------------------------------------------------------------------------------------------------------------------------------------------------------------------------------------------------------------------------------------------------------------------------------------------------------------------------------------------------------------------------------------------------------------------------------------------|
| dmpM-mut3 | Predicted TyrR boxes<br>1 and 2 mutated | ctcacttgtagaacggtgatcagcctgtgctctagagcctgatagttgagcgatacac<br>acGAATTC <b>CAACCGTTAATTTTCGCATT</b> CAGATATATATAACAATATTTACAGGCCACA<br>CCCGAAATGAATTGAAAAACGCATGATCTTTAACGGTATTAGTTACCAGCATTA<br>AACGGTGACTTAAT <b>aTCCGGTTTTATTTA<b>t</b>AGGAGTCTGTCTTAT<b>a</b>TAACTTAAATGT</b><br><b>TA<b>t</b>TCCTGTTTTCTGGGAGGGGCGTTACATATGAAGTAATAAAGGTTTAACTGTACC</b><br><b>CGGTAGCTGTAAATAAGAAATTCACATTTTTTAATCCTTCAGGAGCTAATGAATTC</b> tg<br>atcgttgaagtcgacctacatcgagtgcgcactatcaagagtgtccagtcacgcgat |
| cpx-wt    | Wild type promoter                      | GAATTCCTGTTTTAAATACCTCCGAGGCAGAAAT <b>TACGACATCAAGGCTATCTAATCCA</b><br><b>TGACTTTACGTTGTTTTACACCCCTGACGCATGTTTGCAGCCTGAATCGTAGACTGT</b><br><b>CTCTCGTTGAATCGCGACACGAAAGATTTTGGGAGCAAGTGGAATTC</b>                                                                                                                                                                                                                                                                                              |
| cpx-mut1  | CpxR site 1 mutated                     | GAATTCCTGTTTTAAATACCTCCGAGGCAGAAAT <b>TACGACATCAAGGCTATCTAATCCA</b><br><b>T<b>aAa</b>TTTACGTTGTTTTA<b>t</b>ACCCCTGACGCATGTTTGCAGCCTGAATCGTAGACTGT</b><br><b>CTCTCGTTGAATCGCGACACGAAAGATTTTGGGAGCAAGTGGAATTC</b>                                                                                                                                                                                                                                                                                |
| cpx-mut2  | CpxR site 2 mutated                     | GAATTCCTGTTTTAAATACCTCCGAGGCAGAAAT <b>TACGACATCAAGGCTATCTAATCCA</b><br><b>TGACTTTACGTTGTTTTACACC<b>aaa</b>TGACGCATGTTT<b>Gt</b>AGCCTGAATCGTAGACTGT</b><br><b>CTCTCGTTGAATCGCGACACGAAAGATTTTGGGAGCAAGTGGAATTC</b>                                                                                                                                                                                                                                                                               |
| cpx-mut3  | CpxR site 3 mutated                     | GAATTCCTGTTTTAAATACCTCCGAGGCAGAAAT <b>TACGACATCAAGGCTATCTAATCCA</b><br><b>TGACTTTACGTTGTTTTACACCCCTGACGCATGTTTGCAGCCTGAAT<b>Ca</b>TAGACTGT</b><br><b>CTCT<b>t</b>TTGAATCGCGACACGAAAGATTTTGGGAGCAAGTGGAATTC</b>                                                                                                                                                                                                                                                                                 |

Supplementary Tables S4-S6 are available separately as excel files.

**Supplementary Table S7.** Proteins in the Protein Data Bank with a high probability of matching DmpM as determined by HHPred. The percent probability of the database match to the DmpM amino acid sequence and the percent amino acid identity are indicated. The E-value is defined as for BLAST.

| PDB  | Product                            | Species                           | Probability | E-value  | Identity % |
|------|------------------------------------|-----------------------------------|-------------|----------|------------|
| 3GWZ | Mitomycin 7-O-methyltransferase    | <i>Streptomyces lavendulae</i>    | 100.0       | 5.20E-30 | 27         |
| 3LST | Orsellinic acid methyltransferase  | <i>Micromonospora echinospora</i> | 100.0       | 1.50E-30 | 36         |
| 5EEG | Carminomycin 4-O-methyltransferase | <i>Streptomyces peucetius</i>     | 99.95       | 1.10E-27 | 23         |
| 1FP2 | Isoflavone O-methyltransferase     | <i>Medicago sativa</i>            | 100.0       | 4.50E-32 | 25         |
| 5XOH | Bergaptol O-methyltransferase      | <i>Peucedanum praeruptorum</i>    | 100.0       | 1.80E-31 | 25         |
| 3P9C | Caffeic acid O-methyltransferase   | <i>Lolium perenne</i>             | 99.95       | 9.30E-28 | 23         |

Supplementary Table S8. Quantification of band intensity in EMSAs (Figure 10) with probes containing wild-type or mutant CpxR boxes in the *cpxR-cpxP* intergenic region and various concentrations of TyrR. Band intensities (Int) were quantified using Image Lab<sup>TM</sup> software v. 6.0.1 (Bio-Rad).

| DNA Probe    | TyrR (μM) | Band No. | Relative Front | Background Adjusted Band Volume (Int) | Total Band Volume (Int) | Band % | Lane % |
|--------------|-----------|----------|----------------|---------------------------------------|-------------------------|--------|--------|
| Wild-type    | 0         | 1        | 0.96           | 743392                                | 877666504               | 100.0  | 87.2   |
| Wild-type    | 0.08      | 1        | 0.97           | 712296                                | 1374035832              | 100.0  | 86.8   |
| Wild-type    | 0.87      | 1        | 0.93           | 721448                                | 1496219920              | 100.0  | 89.9   |
| Wild-type    | 2.19      | 1        | 0.17           | 454584                                | 2107926808              | 53.6   | 51.6   |
| Wild-type    | 2.19      | 2        | 0.94           | 393744                                | 1434701112              | 46.4   | 44.7   |
| Wild-type    | 4.39      | 1        | 0.13           | 418600                                | 1489237256              | 48.5   | 45.7   |
| Wild-type    | 4.39      | 2        | 0.94           | 444496                                | 1217276944              | 51.5   | 48.6   |
| Box 1 mutant | 0         | 1        | 0.94           | 562848                                | 1217279024              | 100.0  | 90.4   |
| Box 1 mutant | 0.08      | 1        | 0.92           | 439296                                | 1332842368              | 100.0  | 86.3   |
| Box 1 mutant | 4.39      | 1        | 0.17           | 76692                                 | 2269970604              | 19.0   | 16.5   |
| Box 1 mutant | 4.39      | 2        | 0.93           | 327624                                | 1208227812              | 81.0   | 70.4   |
| Box 2 mutant | 0         | 1        | 0.93           | 775320                                | 1305836792              | 100.0  | 90.7   |
| Box 2 mutant | 0.08      | 1        | 0.93           | 658736                                | 1516514792              | 100.0  | 89.8   |
| Box 2 mutant | 4.39      | 1        | 0.11           | 548392                                | 1523632864              | 78.9   | 73.9   |
| Box 2 mutant | 4.39      | 2        | 0.94           | 147056                                | 666276728               | 21.1   | 19.8   |
| Box 3 mutant | 0         | 1        | 0.94           | 616096                                | 891051304               | 100.0  | 89.4   |
| Box 3 mutant | 0.08      | 1        | 0.91           | 583752                                | 1672779368              | 100.0  | 87.0   |
| Box 3 mutant | 4.39      | 1        | 0.12           | 557994                                | 1677489859              | 87.4   | 82.3   |
| Box 3 mutant | 4.39      | 2        | 0.94           | 80230                                 | 790273071               | 12.6   | 11.8   |

## REFERENCES

1. **Schlicker A, Domingues FS, Rahnenführer J, Lengauer T.** 2006. A new measure for functional similarity of gene products based on Gene Ontology. *BMC Bioinfo* 7:302
2. **Yamamoto K, Ishihama A.** 2006. Characterization of copper-inducible promoters regulated by CpxA/CpxR in *Escherichia coli*. *Biosci Biotechnol Biochem* **70**: 1688-1695.
3. **De Wulf P, Kwon O, Lin ECC.** 1999. The CpxRA signal transduction system of *Escherichia coli*: Growth-related autoactivation and control of unanticipated target operons. *J Bacteriol* **181**: 6772-6778.
4. **Simon R, Priefer U, Pühler A.** 1983. A broad host range mobilization system for *in vivo* genetic engineering: transposon system mutagenesis in gram negative bacteria. *Nat Biotechnol* **1**:784-791.
5. **Ryu RJ, Patten CL.** 2008. Aromatic amino acid-dependent expression of indole-3-pyruvate decarboxylase is regulated by TyrR in *Enterobacter cloacae* UW5. *J Bacteriol* **190**:7200–7208.
6. **Datsenko KA, Wanner BL.** 2000. One-step inactivation of chromosomal genes in *Escherichia coli* K-12 using PCR products. *Proc Natl Acad Sci USA* **97**:6640–6645.
7. **Quandt J, Hynes MF.** 1993. Versatile suicide vectors which allow direct selection for gene replacement in Gram-negative bacteria. *Gene* **127**:15-21.
